# Supplementary material
Source: MDPI journal article supplement (https://www.mdpi.com/2073-4395/11/6/1050)
Supplement: s1 [file s1]

**Table S1.** Cultivar-specific alleles for SSR loci of the analyzed gooseberries.

| Cultivar              | Abbr. | Locus   |         |         |         |         |         |         |         |         |         |         |         |         |         |         |         |         |         |
|-----------------------|-------|---------|---------|---------|---------|---------|---------|---------|---------|---------|---------|---------|---------|---------|---------|---------|---------|---------|---------|
|                       |       | CHS-1   | CHS-2   | DFR1-1  | DFR1-2  | DFR1-3  | DFR1-4  | DFR2-1  | WD-1    | WD-2    | WD-3    | ANS     | UFGT    | HLH-1   | HLH-2   | HLH-3   | HLH-4   | RJL-2   | RJL-6   |
| Avenarius             | Ave   | 343/343 | 268/268 | 399/399 | 390/364 | 323/318 | 326/326 | 261/257 | 189/189 | 378/378 | 204/204 | 237/237 | 343/343 | 208/198 | 243/243 | 319/319 | 246/246 | 254/243 | 295/293 |
| Angliyskiy Zeleniy    | AnZ   | 343/343 | 268/268 | 399/399 | 393/364 | 323/323 | 326/326 | 261/257 | 189/189 | 378/378 | 204/204 | 237/237 | 343/343 | 208/198 | 243/243 | 319/318 | 246/246 | 254/234 | 295/287 |
| Chorny Negus          | ChN   | 343/343 | 268/268 | 399/399 | 390/364 | 318/318 | 326/326 | 261/261 | 189/189 | 378/378 | 204/204 | 237/237 | 346/343 | 208/198 | 247/243 | 319/318 | 246/246 | 243/243 | 301/291 |
| Chernomor             | Che   | 343/343 | 268/268 | 399/399 | 370/364 | 323/320 | 326/326 | 258/257 | 189/189 | 378/378 | 204/204 | 237/237 | 343/343 | 208/198 | 247/243 | 319/314 | 246/246 | 243/228 | 295/285 |
| Consul (Senator)      | Con   | 343/343 | 268/268 | 399/399 | 370/364 | 323/320 | 326/326 | 258/257 | 189/189 | 378/378 | 204/204 | 237/237 | 343/343 | 208/198 | 247/243 | 319/314 | 246/246 | 254/228 | 295/285 |
| Chelyabinskiy Zeleniy | ChZ   | 343/343 | 268/268 | 399/399 | 370/364 | 323/320 | 326/326 | 258/257 | 189/189 | 378/378 | 204/204 | 237/237 | 343/343 | 208/198 | 243/243 | 319/318 | 246/246 | 254/254 | 295/285 |
| Grushenka             | Gru   | 343/343 | 268/268 | 399/399 | 375/364 | 326/323 | 326/326 | 259/257 | 189/189 | 378/378 | 204/204 | 237/237 | 343/343 | 208/198 | 247/243 | 319/314 | 246/246 | 254/228 | 295/283 |
| Invicta               | Inv   | 343/343 | 268/268 | 399/399 | 377/370 | 324/320 | 326/326 | 259/258 | 189/189 | 378/378 | 204/204 | 237/237 | 343/343 | 208/198 | 247/243 | 319/318 | 246/246 | 254/236 | 291/285 |
| Kolobok               | Kol   | 343/343 | 268/268 | 399/399 | 377/364 | 323/323 | 326/326 | 259/257 | 189/189 | 378/378 | 204/204 | 237/237 | 343/343 | 208/198 | 243/243 | 319/318 | 246/246 | 254/222 | 295/291 |
| Kursu Dzintars        | KuD   | 343/343 | 268/268 | 399/399 | 375/370 | 326/320 | 326/326 | 261/258 | 189/189 | 378/378 | 204/204 | 237/237 | 343/343 | 208/198 | 243/243 | 319/318 | 246/246 | 254/243 | 301/285 |
| Laskoviy              | Las   | 343/343 | 268/268 | 399/399 | 375/364 | 326/320 | 326/326 | 259/257 | 189/189 | 378/378 | 204/204 | 237/237 | 343/343 | 208/198 | 247/243 | 319/314 | 246/246 | 254/228 | 295/283 |
| Lepaan Red            | LeR   | 343/343 | 268/268 | 399/399 | 377/370 | 324/320 | 326/326 | 259/258 | 189/189 | 378/378 | 204/204 | 237/237 | 343/343 | 208/198 | 243/243 | 319/319 | 246/246 | 254/236 | 291/285 |
| Malahit               | Mal   | 343/343 | 268/268 | 399/399 | 364/364 | 323/323 | 326/326 | 261/257 | 189/189 | 378/378 | 204/204 | 237/237 | 346/343 | 208/198 | 243/243 | 319/319 | 246/246 | 254/240 | 295/291 |
| Moskovskiy Krasniy    | MoK   | 343/343 | 268/268 | 399/399 | 370/364 | 323/323 | 326/326 | 261/257 | 189/189 | 378/378 | 204/204 | 237/237 | 343/343 | 208/198 | 243/243 | 319/314 | 246/246 | 254/243 | 295/293 |
| Nezhniy               | Nez   | 343/343 | 268/268 | 399/399 | 364/364 | 323/318 | 326/326 | 261/257 | 189/189 | 378/378 | 204/204 | 241/237 | 355/343 | 208/198 | 247/243 | 319/314 | 246/246 | 243/231 | 295/291 |
| Rozoviy-2             | Ro2   | 343/343 | 268/268 | 399/399 | 370/364 | 323/320 | 326/326 | 258/257 | 189/189 | 378/378 | 204/204 | 237/237 | 343/343 | 208/198 | 243/243 | 319/319 | 246/246 | 254/243 | 295/285 |
| Russkiy               | Rus   | 343/343 | 268/268 | 399/399 | 370/364 | 323/320 | 326/326 | 258/257 | 189/189 | 378/378 | 204/204 | 237/237 | 343/343 | 208/198 | 243/243 | 319/319 | 246/246 | 254/243 | 295/285 |
| Russkiy Zholti        | RuZ   | 343/343 | 268/268 | 399/399 | 370/364 | 323/320 | 326/326 | 258/257 | 189/189 | 378/378 | 204/204 | 237/237 | 343/343 | 208/198 | 243/243 | 319/319 | 246/246 | 254/243 | 295/285 |
| Severniy Kapitan      | SeK   | 343/343 | 268/268 | 399/399 | 370/364 | 323/320 | 326/326 | 258/257 | 189/189 | 378/378 | 204/204 | 237/237 | 343/343 | 208/198 | 248/243 | 319/318 | 246/246 | 254/228 | 295/285 |
| Seyanets Lefora       | SeL   | 343/343 | 268/268 | 399/399 | 388/370 | 326/320 | 326/326 | 261/258 | 189/189 | 378/378 | 204/204 | 237/237 | 343/343 | 208/198 | 243/243 | 319/318 | 246/246 | 254/254 | 301/285 |
| Triumfalniy           | Tri   | 343/343 | 268/268 | 399/399 | 397/364 | 323/318 | 326/326 | 261/257 | 189/189 | 378/378 | 204/204 | 237/237 | 343/343 | 208/198 | 243/243 | 319/319 | 246/246 | 254/243 | 301/295 |
| Vladil                | Vla   | 343/343 | 268/268 | 399/399 | 370/364 | 323/320 | 326/326 | 258/257 | 189/189 | 378/378 | 204/204 | 237/237 | 343/343 | 208/198 | 248/243 | 319/318 | 246/246 | 254/228 | 295/285 |

Unique alleles characteristic of varieties with high frost resistance are highlighted in green.  
Unique alleles characteristic of varieties with a low degree of spinosity are highlighted in yellow.
